# Supplementary material
Source: publisher site journal article supplement (http://kjim.org/upload/media/kjim-2020-559-suppl1.pdf)
Supplement: Supplementary file 1 [file kjim-2020-559-suppl1.pdf]

**Supplementary Table 1. Baseline characteristics of patients included in efficacy analysis of FVC according to the dose of pirfenidone**

| Demographic characteristics            | Standard dose<br>(n = 32) | Non-standard dose<br>(n = 82) | p value |
|----------------------------------------|---------------------------|-------------------------------|---------|
| Male sex                               | 28 (87.5)                 | 58 (70.7)                     | 0.062   |
| Age, yr                                | 68.8 ± 8.5                | 72.3 ± 8.6                    | 0.051   |
| Body mass index, kg/m <sup>2</sup>     | 25.5 ± 3.1                | 24.1 ± 3.0                    | 0.028   |
| Body surface area, m <sup>2</sup>      | 1.79 ± 0.14               | 1.68 ± 0.15                   | 0.001   |
| Smoking history                        |                           |                               | 0.409   |
| Current smoker                         | 2 (6.5)                   | 12 (15.0)                     |         |
| Former smoker                          | 20 (64.5)                 | 43 (53.8)                     |         |
| Never smoker                           | 9 (29.0)                  | 25 (31.3)                     |         |
| Comorbidity                            |                           |                               |         |
| Diabetes                               | 6 (18.8)                  | 16 (19.5)                     | 0.926   |
| Hypertension                           | 6 (18.8)                  | 17 (20.7)                     | 0.813   |
| Coronary arterial disease              | 2 (6.3)                   | 7 (8.5)                       | 1.000   |
| Chronic obstructive pulmonary disease  | 3 (9.4)                   | 6 (7.3)                       | 0.709   |
| Surgical lung biopsy                   | 3 (9.4)                   | 15 (18.3)                     | 0.241   |
| Definite UIP pattern on CT             | 28 (87.5)                 | 70 (85.4)                     | 1.000   |
| Diagnosis (≤ 1 yr) of IPF              | 16 (50.0)                 | 34 (41.5)                     | 0.409   |
| Pulmonary function test                |                           |                               |         |
| %FVC <sub>predicted</sub>              | 71.5 ± 9.3                | 73.7 ± 11.7                   | 0.342   |
| FVC, L                                 | 2.60 ± 0.54               | 2.42 ± 0.59                   | 0.134   |
| %DL <sub>CO</sub> <sub>predicted</sub> | 62.3 ± 20.2               | 62.5 ± 16.6                   | 0.965   |
| Use of supplemental oxygen             | 0                         | 2 (2.4)                       | 1.000   |
| 6-Minute walk distance, m              | 446.6 ± 67.8              | 404.8 ± 104.7                 | 0.016   |
| mMRC grade                             | 0.9 ± 0.7                 | 1.4 ± 0.7                     | 0.003   |
| GAP stage                              |                           |                               | 0.330   |
| GAP I                                  | 16 (51.6)                 | 50 (61.7)                     |         |
| GAP II                                 | 15 (48.4)                 | 31 (38.3)                     |         |
| GAP III                                | 0                         | 0                             |         |
| Previous treatment                     |                           |                               | 0.627   |
| No                                     | 25 (80.6)                 | 60 (73.2)                     |         |
| Steroid only                           | 4 (12.9)                  | 17 (20.7)                     |         |
| Steroid + immunosuppressant            | 1 (3.2)                   | 4 (4.9)                       |         |
| Immunosuppressant only                 | 1 (3.2)                   | 1 (1.2)                       |         |
| Combined treatment with pirfenidone    |                           |                               | 0.544   |
| No                                     | 21 (65.6)                 | 60 (73.2)                     |         |
| Steroid only                           | 11 (34.4)                 | 21 (25.6)                     |         |
| Steroid + immunosuppressant            | 0                         | 1 (1.2)                       |         |

Values are presented as number (%) or mean ± SD.

FVC, forced vital capacity; UIP, usual interstitial pneumonia; CT, computed tomography; IPF, idiopathic pulmonary fibrosis; DL<sub>CO</sub>, diffusing capacity of the lungs for carbon monoxide; mMRC, modified Medical Research Council; CAP, Gender-Age-Physiology.
